# Supplementary material
Source: publisher figshare collection journal article supplement (https://acs.figshare.com/ndownloader/files/4474093)
Supplement: Supplementary file 1 [file 4474093]

## Supporting Information

**Lihui Zhang, Guang Jia, Hongpeng You\*, Kai Liu, Mei Yang, Yanhua**

**Song, Yuhua Zheng, Yeju Huang, Ning Guo, and Hongjie Zhang\***

State key Laboratory of Rare Earth Resource utilization Changchun

Institute of Applied Chemistry

Chinese Academy of Sciences, 130022 and Graduate University of the

Chinese Academy of Sciences, Beijing 100049, P. R. China

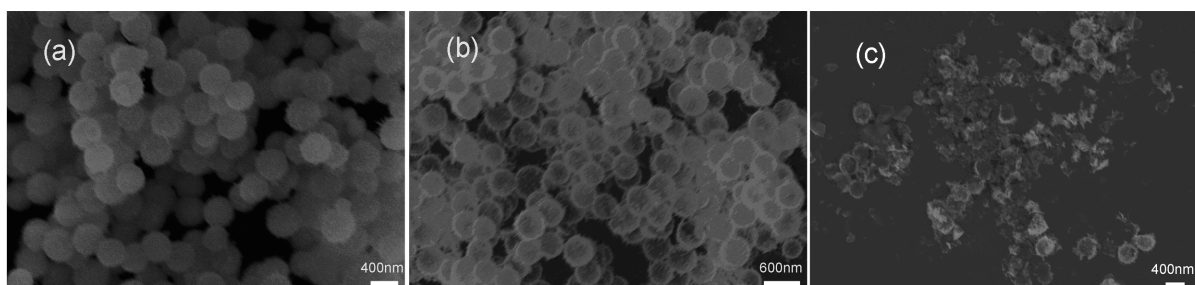

**Figure S1.** The low-magnification SEM image of the as-prepared sample after the hydrothermal process of 15 h(a); the hollow spheres obtained after the acid erosion(b); the crushed particles generated by the hollow sphere **after strongly stirring** (c)

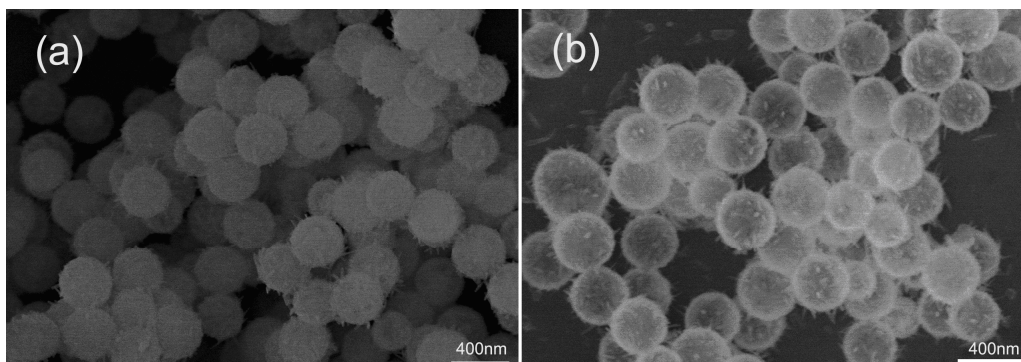

**Figure S2.** The as-prepared  $\text{YPO}_4$  samples that obtained after the hydrothermal process of 120 h (a); the hollow sphere of the  $\text{YPO}_4$  of the sample after the acid erosion (b)
